# Supplementary material for: A Computer-Assisted System for Early Mortality Risk Prediction in Patients with Traumatic Brain Injury Using Artificial Intelligence Algorithms in Emergency Room Triage
Source: MDPI journal article supplement (doi:10.3390/brainsci12050612), 2022-05-07
Supplement: s1 [file s1]

**Supplementary Table S1. Hyper-parameters range for experiments**

| Algorithm and Hyper-parameter | Values                                            |
|-------------------------------|---------------------------------------------------|
| Logistic regression           |                                                   |
| penalty                       | l1, l2                                            |
| C                             | np.logspace(-3,3,7), 1, 1.2, 5, 15, 30, 100       |
| max_iter                      | 100, 500, 1000, 2500                              |
| Random forest                 |                                                   |
| n_estimators                  | 100, 500, 800, 1000                               |
| max_depth                     | 15, 30, 50, 90, 150                               |
| min_samples_split             | 2, 4, 6, 10, 15                                   |
| max_features                  | auto, 0.5, 1, 10, 30                              |
| class_weight                  | balanced, balanced_subsample                      |
| random_state                  | 9, 15, 30, 45                                     |
| SVM                           |                                                   |
| kernel                        | rbf, linear                                       |
| C                             | 1, 10, 100, 500, 1000, 1500, 3000                 |
| gamma                         | scale, 1e-2, 1e-3, 1e-4                           |
| LightGBM                      |                                                   |
| learning_rate                 | 1e-3, 1e-2, 0.05, 0.1                             |
| num_iterations                | 100, 500, 800, 1000                               |
| max_depth                     | 15, 30, 50, 90                                    |
| random_state                  | 9, 15, 30, 45                                     |
| MLPClassifier                 |                                                   |
| hidden_layer_sizes            | (200, 150, 75), (100,90,50),<br>(100,70), (90,45) |
| earning_rate_init             | 1e-3, 1e-2                                        |
| early_stopping                | True, False                                       |
| max_iter                      | 100, 500                                          |
| batch_size                    | auto, 16, 32, 50                                  |
| XGBoost                       |                                                   |
| learning_rate                 | 1e-4, 1e-3, 1e-2                                  |
| gamma                         | 1e-2, 1e-3, 1e-4, 1e-5                            |
| num_iterations                | 100, 500, 800                                     |
| max_depth                     | 15, 30, 50, 90                                    |
| num_parallel_tree             | 1, 2, 5, 15                                       |
